# Supplementary material
Source: PubMed Central journal article supplement (PMC547828)
Supplement: pnas_102_5_1560__4.pdf [file pnas_102_5_1560__4.pdf]

| Width | Column Type Set | bits/column | min $g$ (local search) |
|-------|-----------------|-------------|------------------------|
| 6     | A               | 1.900       | 0.01                   |
| 7     | A               | 1.900       | 0.01                   |
| 8     | A               | 1.800       | 0.01                   |
| 9     | A               | 1.650       | 0.05                   |
| 10    | A               | 1.600       | 0.05                   |
| 11    | B               | 1.550       | 0.10                   |
| 12    | B               | 1.500       | 0.10                   |

$$A = \left\{ \left[ \begin{array}{c} 1 \\ 0 \\ 0 \\ 0 \end{array} \right], \left[ \begin{array}{c} 0 \\ 1 \\ 0 \\ 0 \end{array} \right], \left[ \begin{array}{c} 0 \\ 0 \\ 1 \\ 0 \end{array} \right], \left[ \begin{array}{c} 0 \\ 0 \\ 0 \\ 1 \end{array} \right], \left[ \begin{array}{c} .5 \\ .5 \\ 0 \\ 0 \end{array} \right], \left[ \begin{array}{c} .5 \\ 0 \\ .5 \\ 0 \end{array} \right], \left[ \begin{array}{c} .5 \\ 0 \\ 0 \\ .5 \end{array} \right], \left[ \begin{array}{c} 0 \\ .5 \\ .5 \\ 0 \end{array} \right], \left[ \begin{array}{c} 0 \\ .5 \\ 0 \\ .5 \end{array} \right], \left[ \begin{array}{c} 0 \\ 0 \\ .5 \\ .5 \end{array} \right], \left[ \begin{array}{c} .33 \\ .33 \\ .33 \\ 0 \end{array} \right], \left[ \begin{array}{c} .33 \\ .33 \\ 0 \\ .33 \end{array} \right], \left[ \begin{array}{c} .33 \\ 0 \\ .33 \\ .33 \end{array} \right], \left[ \begin{array}{c} 0 \\ .33 \\ .33 \\ .33 \end{array} \right] \right\}$$

$$B = \left\{ \left[ \begin{array}{c} 1 \\ 0 \\ 0 \\ 0 \end{array} \right], \left[ \begin{array}{c} 0 \\ 1 \\ 0 \\ 0 \end{array} \right], \left[ \begin{array}{c} 0 \\ 0 \\ 1 \\ 0 \end{array} \right], \left[ \begin{array}{c} 0 \\ 0 \\ 0 \\ 1 \end{array} \right], \left[ \begin{array}{c} .5 \\ .5 \\ 0 \\ 0 \end{array} \right], \left[ \begin{array}{c} .5 \\ 0 \\ .5 \\ 0 \end{array} \right], \left[ \begin{array}{c} .5 \\ 0 \\ 0 \\ .5 \end{array} \right], \left[ \begin{array}{c} 0 \\ .5 \\ .5 \\ 0 \end{array} \right], \left[ \begin{array}{c} 0 \\ .5 \\ 0 \\ .5 \end{array} \right], \left[ \begin{array}{c} 0 \\ 0 \\ .5 \\ .5 \end{array} \right], \left[ \begin{array}{c} 0 \\ .5 \\ .5 \\ .5 \end{array} \right] \right\}$$

Table 7. Values for parameters of the DME algorithm that we have found to produce good results. For each width, the table gives the set of column types, minimum bits/column and smallest value of  $g$  in local search. For the column type sets, we usually replace zero entries with  $10^{-10}$  to prevent taking logarithms of 0. These are the values we use most often for identifying transcription factor binding sites.
