# Supplementary material
Source: PubMed Central journal article supplement (PMC547828)
Supplement: pnas_102_5_1560__5.pdf [file pnas_102_5_1560__5.pdf]

| SeqSet     | Sequence Logo                                                                      | Best TRANSFAC Match                                                                 |           |        | Divergence |
|------------|------------------------------------------------------------------------------------|-------------------------------------------------------------------------------------|-----------|--------|------------|
|            |                                                                                    | Sequence Logo                                                                       | Accession | Factor |            |
| EPD-liver  |  |  | M00987    | FOXP1  | 0.74       |
| LSPS       |  |  | M00723    | GAGA   | 1.26       |
| WF         |  |  | M00317    | Poly-A | 1.55       |
| EPD-muscle |  |  | M00317    | Poly-A | 1.27       |

Table 8 . Motifs identified by MDscan
