# Supplementary material
Source: PubMed Central journal article supplement (PMC547828)
Supplement: pnas_102_5_1560__6.pdf [file pnas_102_5_1560__6.pdf]

| SeqSet     | Sequence Logo | Best TRANSFAC Match |           |           | Divergence |
|------------|---------------|---------------------|-----------|-----------|------------|
|            |               | Sequence Logo       | Accession | Factor    |            |
| EPD-liver  |               |                     | M00790    | HNF1      | 0.32       |
| LSPS       |               |                     | M00132    | HNF1      | 0.24       |
| WF         |               |                     | M00932    | Sp-1      | 0.78       |
| WF         |               |                     | M00986    | Churchill | 0.60       |
| EPD-muscle |               |                     | M00215    | SRF       | 0.20       |
| EPD-muscle |               |                     | M00491    | MAZR      | 0.72       |
| EPD-muscle |               |                     | M01007    | SRF       | 0.25       |
| EPD-muscle |               |                     | M00392    | AGL3      | 0.27       |
| EPD-muscle |               |                     | M00649    | MAZ       | 0.69       |
| EPD-muscle |               |                     | M00083    | MZF1      | 0.60       |

Table 9. Top motifs identified by MDscan after masking simple repeats
