# Supplementary material
Source: PubMed Central journal article supplement (PMC547828)
Supplement: pnas_102_5_1560__7.pdf [file pnas_102_5_1560__7.pdf]

| SeqSet     | Sequence Logo | Best TRANSFAC Match |           |         | Divergence |
|------------|---------------|---------------------|-----------|---------|------------|
|            |               | Sequence Logo       | Accession | Factor  |            |
| EPD-liver  |               |                     | M00987    | FOXP1   | 1.21       |
| EPD-liver  |               |                     | M00930    | Oct-1   | 1.38       |
| EPD-liver  |               |                     | M00138    | Oct-1   | 1.38       |
| EPD-liver  |               |                     | M00160    | SRY     | 1.16       |
| LSPS       |               |                     | M00803    | E2F     | 0.70       |
| LSPS       |               |                     | M00704    | TEF-1   | 0.69       |
| LSPS       |               |                     | M00491    | MAZR    | 0.97       |
| LSPS       |               |                     | M00980    | TBP     | 0.94       |
| WF         |               |                     | M00138    | Oct-1   | 0.97       |
| WF         |               |                     | M00695    | ETF     | 0.97       |
| WF         |               |                     | M00734    | CIZ     | 1.31       |
| EPD-muscle |               |                     | M01011    | HNF1    | 1.01       |
| EPD-muscle |               |                     | M00980    | TBP     | 0.72       |
| EPD-muscle |               |                     | M00803    | E2F     | 0.57       |
| EPD-muscle |               |                     | M00339    | c-Ets-1 | 1.41       |

Table 10. Top motifs identified by Gibbs Motif Sampler
